# Supplementary material for: Association of Coffee, Decaffeinated Coffee and Caffeine Intake from Coffee with Cognitive Performance in Older Adults: National Health and Nutrition Examination Survey (NHANES) 2011–2014
Source: PubMed Central journal article supplement (PMC7146118; doi:10.3390/nu12030840), 2020-03-20
Supplement: nutrients-12-00840-s001.pdf [file nutrients-12-00840-s001.pdf]

**Table 1.** Coffee type and caffeinated status for each coffee item identified by USDA food code in dietary recall, NHANES 2011-2014.

| USDA food code | USDA food descriptions                             | Caffeinated status <sup>a</sup> |
|----------------|----------------------------------------------------|---------------------------------|
| 92100000       | Coffee, NS as to type                              | C                               |
| 92100500       | Coffee, NS as to brewed or instant                 | C                               |
| 92101000       | Coffee, brewed                                     | C                               |
| 92101500       | Coffee, brewed, blend of regular and decaffeinated | D                               |
| 92101600       | Coffee, Turkish                                    | C                               |
| 92101610       | Coffee, espresso                                   | C                               |
| 92101630       | Coffee, espresso, decaffeinated                    | D                               |
| 92101700       | Coffee, brewed, flavored                           | C                               |
| 92101800       | Coffee, Cuban                                      | C                               |
| 92101810       | Coffee, macchiato                                  | C                               |
| 92101820       | Coffee, macchiato, sweetened                       | C                               |
| 92101850       | Coffee, cafe con leche                             | C                               |
| 92101851       | Coffee, cafe con leche, decaffeinated              | D                               |
| 92101900       | Coffee, Latte                                      | C                               |
| 92101901       | Coffee, Latte, nonfat                              | C                               |
| 92101903       | Coffee, Latte, with non-dairy milk                 | C                               |
| 92101904       | Coffee, Latte, flavored                            | C                               |
| 92101905       | Coffee, Latte, nonfat, flavored                    | C                               |
| 92101906       | Coffee, Latte, with non-dairy milk, flavored       | C                               |
| 92101910       | Coffee, Latte, decaffeinated                       | D                               |
| 92101911       | Coffee, Latte, decaffeinated, nonfat               | D                               |
| 92101913       | Coffee, Latte, decaffeinated, with non-dairy milk  | D                               |
| 92101917       | Coffee, Latte, decaffeinated, flavored             | D                               |
| 92101918       | Coffee, Latte, decaffeinated, nonfat, flavored     | D                               |

|          |                                                                           |   |
|----------|---------------------------------------------------------------------------|---|
| 92101919 | Coffee, Latte, decaffeinated, with non-dairy milk, flavored               | D |
| 92101920 | Frozen coffee drink                                                       | C |
| 92101921 | Frozen coffee drink, nonfat                                               | C |
| 92101923 | Frozen coffee drink, with non-dairy milk                                  | C |
| 92101925 | Frozen coffee drink, with whipped cream                                   | C |
| 92101926 | Frozen coffee drink, nonfat, with whipped cream                           | C |
| 92101928 | Frozen coffee drink, with non-dairy milk and whipped cream                | C |
| 92101930 | Frozen coffee drink, decaffeinated                                        | D |
| 92101931 | Frozen coffee drink, decaffeinated, nonfat                                | D |
| 92101933 | Frozen coffee drink, decaffeinated, with non-dairy milk                   | D |
| 92101935 | Frozen coffee drink, decaffeinated, with whipped cream                    | D |
| 92101936 | Frozen coffee drink, decaffeinated, nonfat, with whipped cream            | D |
| 92101938 | Frozen coffee drink, decaffeinated, with non-dairy milk and whipped cream | D |
| 92101950 | Coffee, Cafe Mocha                                                        | C |
| 92101955 | Coffee, Cafe Mocha, nonfat                                                | C |
| 92101960 | Coffee, Cafe Mocha, with non-dairy milk                                   | C |
| 92101965 | Coffee, Cafe Mocha, decaffeinated                                         | D |
| 92101970 | Coffee, Cafe Mocha, decaffeinated, nonfat                                 | D |
| 92101975 | Coffee, Cafe Mocha, decaffeinated, with non-dairy milk                    | D |
| 92102000 | Frozen mocha coffee drink                                                 | C |
| 92102010 | Frozen mocha coffee drink, nonfat                                         | C |
| 92102020 | Frozen mocha coffee drink, with non-dairy milk                            | C |

|          |                                                                                 |   |
|----------|---------------------------------------------------------------------------------|---|
| 92102030 | Frozen mocha coffee drink, with whipped cream                                   | C |
| 92102040 | Frozen mocha coffee drink, nonfat, with whipped cream                           | C |
| 92102050 | Frozen mocha coffee drink, with non-dairy milk and whipped cream                | C |
| 92102060 | Frozen mocha coffee drink, decaffeinated                                        | D |
| 92102070 | Frozen mocha coffee drink, decaffeinated, nonfat                                | D |
| 92102080 | Frozen mocha coffee drink, decaffeinated, with non-dairy milk                   | D |
| 92102090 | Frozen mocha coffee drink, decaffeinated, with whipped cream                    | D |
| 92102100 | Frozen mocha coffee drink, decaffeinated, nonfat, with whipped cream            | D |
| 92102110 | Frozen mocha coffee drink, decaffeinated, with non-dairy milk and whipped cream | D |
| 92102400 | Iced Coffee, brewed                                                             | C |
| 92102401 | Iced Coffee, brewed, decaffeinated                                              | D |
| 92102450 | Iced Coffee, pre-lightened and pre-sweetened                                    | C |
| 92102500 | Coffee, Iced Latte                                                              | C |
| 92102501 | Coffee, Iced Latte, nonfat                                                      | C |
| 92102502 | Coffee, Iced Latte, with non-dairy milk                                         | C |
| 92102503 | Coffee, Iced Latte, flavored                                                    | C |
| 92102504 | Coffee, Iced Latte, nonfat, flavored                                            | C |
| 92102505 | Coffee, Iced Latte, with non-dairy milk, flavored                               | C |
| 92102510 | Coffee, Iced Latte, decaffeinated                                               | D |
| 92102511 | Coffee, Iced Latte, decaffeinated, nonfat                                       | D |
| 92102512 | Coffee, Iced Latte, decaffeinated, with non-dairy milk                          | D |

|          |                                                                                                   |   |
|----------|---------------------------------------------------------------------------------------------------|---|
| 92102513 | Coffee, Iced Latte, decaffeinated, flavored                                                       | D |
| 92102514 | Coffee, Iced Latte, decaffeinated, nonfat, flavored                                               | D |
| 92102515 | Coffee, Iced Latte, decaffeinated, with non-dairy milk, flavored                                  | D |
| 92102600 | Coffee, Iced Cafe Mocha                                                                           | C |
| 92102601 | Coffee, Iced Cafe Mocha, nonfat                                                                   | C |
| 92102602 | Coffee, Iced Cafe Mocha, with non-dairy milk                                                      | C |
| 92102610 | Coffee, Iced Cafe Mocha, decaffeinated                                                            | D |
| 92102611 | Coffee, Iced Cafe Mocha, decaffeinated, nonfat                                                    | D |
| 92102612 | Coffee, Iced Cafe Mocha, decaffeinated, with non-dairy milk                                       | D |
| 92103000 | Coffee, instant, reconstituted                                                                    | C |
| 92104000 | Coffee, instant, 50% less caffeine, reconstituted                                                 | C |
| 92111000 | Coffee, NS as to brewed or instant, decaffeinated                                                 | D |
| 92111010 | Coffee, brewed, decaffeinated                                                                     | D |
| 92114000 | Coffee, instant, decaffeinated, reconstituted                                                     | D |
| 92121000 | Coffee, instant, pre-lightened and pre-sweetened with sugar, reconstituted                        | C |
| 92121001 | Coffee, instant, decaffeinated, pre-lightened and pre-sweetened with sugar, reconstituted         | D |
| 92121010 | Coffee, instant, pre-sweetened with sugar, reconstituted                                          | C |
| 92121020 | Coffee, mocha, instant, pre-lightened and pre-sweetened with sugar, reconstituted                 | C |
| 92121030 | Coffee, mocha, instant, pre-lightened and pre-sweetened with low calorie sweetener, reconstituted | C |
| 92121040 | Coffee, instant, pre-lightened and pre-sweetened with                                             | C |

|          |                                                                                                                  |   |
|----------|------------------------------------------------------------------------------------------------------------------|---|
|          | low calorie sweetener, reconstituted                                                                             |   |
| 92121041 | Coffee, instant, decaffeinated, pre-lightened and pre-sweetened with low calorie sweetener, reconstituted        | D |
| 92121050 | Coffee, mocha, instant, decaffeinated, pre-lightened and pre-sweetened with low calorie sweetener, reconstituted | D |
| 92130000 | Coffee, pre-lightened and pre-sweetened with sugar                                                               | C |
| 92130001 | Coffee, decaffeinated, pre-lightened and pre-sweetened with sugar                                                | D |
| 92130005 | Coffee, pre-lightened and pre-sweetened with low calorie sweetener                                               | C |
| 92130006 | Coffee, decaffeinated, pre-lightened and pre-sweetened with low calorie sweetener                                | D |
| 92130010 | Coffee, pre-lightened                                                                                            | C |
| 92130011 | Coffee, decaffeinated, pre-lightened                                                                             | D |
| 92130020 | Coffee, pre-sweetened with sugar                                                                                 | D |
| 92130021 | Coffee, decaffeinated, pre-sweetened with sugar                                                                  | C |
| 92130030 | Coffee, pre-sweetened with low calorie sweetener                                                                 | C |
| 92130031 | Coffee, decaffeinated, pre-sweetened with low calorie sweetener                                                  | D |
| 92152000 | Coffee and chicory, brewed                                                                                       | C |
| 92152010 | Coffee and chicory, brewed, decaffeinated                                                                        | D |
| 92161000 | Coffee, Cappuccino                                                                                               | C |
| 92161001 | Coffee, Cappuccino, nonfat                                                                                       | C |
| 92161002 | Coffee, Cappuccino, with non-dairy milk                                                                          | C |
| 92162000 | Coffee, Cappuccino, decaffeinated                                                                                | D |
| 92162001 | Coffee, Cappuccino, decaffeinated, nonfat                                                                        | D |

|          |                                                                                                                      |   |
|----------|----------------------------------------------------------------------------------------------------------------------|---|
| 92162002 | Coffee, Cappuccino, decaffeinated, with non-dairy milk                                                               | D |
| 92171000 | Coffee, bottled/canned                                                                                               | C |
| 92171010 | Coffee, bottled/canned, light                                                                                        | C |
| 92191100 | Coffee, instant, not reconstituted                                                                                   | C |
| 92191105 | Coffee, instant, 50% less caffeine, not reconstituted                                                                | C |
| 92191200 | Coffee, instant, decaffeinated, not reconstituted                                                                    | D |
| 92191400 | Coffee, instant, pre-sweetened with sugar, not reconstituted                                                         | C |
| 92192000 | Coffee, mocha, instant, pre-lightened and pre-sweetened with sugar, not reconstituted                                | C |
| 92192030 | Coffee, mocha, instant, pre-lightened and pre-sweetened with low calorie sweetener, not reconstituted                | C |
| 92192040 | Coffee, mocha, instant, decaffeinated, pre-lightened and pre-sweetened with low calorie sweetener, not reconstituted | D |
| 92193000 | Coffee, instant, pre-lightened and pre-sweetened with sugar, not reconstituted                                       | C |
| 92193005 | Coffee, instant, decaffeinated, pre-lightened and pre-sweetened with sugar, not reconstituted                        | D |
| 92193020 | Coffee, instant, pre-lightened and pre-sweetened with low calorie sweetener, not reconstituted                       | C |
| 92193025 | Coffee, instant, decaffeinated, pre-lightened and pre-sweetened with low calorie sweetener, not reconstituted        | D |

---

<sup>a</sup> Caffeinated status: D, decaffeinated coffee; C, caffeinated coffee

**Table 2.** Weighted odds ratios (95% confidence intervals) for scores on CERAD test, Animal Fluency test, and DSST test across caffeinated coffee (N = 2094) and decaffeinated coffee (N = 958) in sensitivity analysis, NHANES 2011–2014.

|                              | CERAD test           |                      |                      | Animal Fluency test  |                      |                      | DSST                 |                      |                      |
|------------------------------|----------------------|----------------------|----------------------|----------------------|----------------------|----------------------|----------------------|----------------------|----------------------|
|                              | Model 1 <sup>1</sup> | Model 2 <sup>1</sup> | Model 3 <sup>1</sup> | Model 1 <sup>1</sup> | Model 2 <sup>1</sup> | Model 3 <sup>1</sup> | Model 1 <sup>1</sup> | Model 2 <sup>1</sup> | Model 3 <sup>1</sup> |
| Caffeinated coffee (g/day)   |                      |                      |                      |                      |                      |                      |                      |                      |                      |
| 0                            | 1.00 (Ref.)          | 1.00 (Ref.)          | 1.00 (Ref.)          | 1.00 (Ref.)          | 1.00 (Ref.)          | 1.00 (Ref.)          | 1.00 (Ref.)          | 1.00 (Ref.)          | 1.00 (Ref.)          |
| 1 to <384.8                  | 0.95(0.60-1.48)      | 0.96(0.61-1.53)      | 0.96 (0.58-1.57)     | 0.95(0.65-1.37)      | 0.91(0.64-1.29)      | 0.96(0.66-1.41)      | 1.10(0.75-1.60)      | 1.05(0.70-1.57)      | 1.09(0.71-1.68)      |
| ≥384.8                       | 0.83(0.52-1.34)      | 0.78(0.48-1.28)      | 0.89(0.55-1.43)      | 0.75(0.49-1.14)      | 0.74(0.48-1.12)      | 0.89(0.59-1.35)      | 0.59(0.42-0.85) **   | 0.57(0.40-0.82) **   | 0.65(0.45-0.93) *    |
| Decaffeinated coffee (g/day) |                      |                      |                      |                      |                      |                      |                      |                      |                      |
| 0                            | 1.00 (Ref.)          | 1.00 (Ref.)          | 1.00 (Ref.)          | 1.00 (Ref.)          | 1.00 (Ref.)          | 1.00 (Ref.)          | 1.00 (Ref.)          | 1.00 (Ref.)          | 1.00 (Ref.)          |
| >0                           | 0.91(0.41-1.95)      | 1.01(0.44-2.33)      | 1.31(0.61-2.74)      | 0.94(0.48-1.87)      | 0.87(0.41-1.80)      | 1.01(0.45-1.97)      | 1.11(0.51-2.41)      | 1.09(0.47-2.23)      | 1.76(0.58-2.87)      |

Abbreviations: The Consortium to Establish a Registry for Alzheimer’s Disease (CERAD); Digit Symbol Substitution Test (DSST).

<sup>1</sup>Calculated using binary logistic regression

Model 2 adjusted for age and gender

Model 3 adjusted for age and gender, race, educational level, marital status, income, BMI, energy, drinking status, smoking status, hypertension, diabetes, and stroke

\* $p < 0.05$ ; \*\* $p < 0.01$

**Table S3.** Weighted odds ratios (95% confidence intervals) for scores on CERAD test, Animal Fluency test, and DSST test across quartiles of caffeine intake from coffee excluding decaffeinated coffee consumers, NHANES 2011–2014 (N = 1384).

|                   | CERAD test           |                      |                      | Animal Fluency test  |                      |                      | DSST                 |                      |                      |
|-------------------|----------------------|----------------------|----------------------|----------------------|----------------------|----------------------|----------------------|----------------------|----------------------|
|                   | Model 1 <sup>1</sup> | Model 2 <sup>1</sup> | Model 3 <sup>1</sup> | Model 1 <sup>1</sup> | Model 2 <sup>1</sup> | Model 3 <sup>1</sup> | Model 1 <sup>1</sup> | Model 2 <sup>1</sup> | Model 3 <sup>1</sup> |
| Caffeine (mg/day) |                      |                      |                      |                      |                      |                      |                      |                      |                      |
| <67               | 1.00 (Ref.)          | 1.00 (Ref.)          | 1.00 (Ref.)          | 1.00 (Ref.)          | 1.00 (Ref.)          | 1.00 (Ref.)          | 1.00 (Ref.)          | 1.00 (Ref.)          | 1.00 (Ref.)          |
| 67 to <124.5      | 0.69(0.38-1.25)      | 0.67(0.38-1.20)      | 0.70(0.36-1.35)      | 1.27(0.77-2.07)      | 1.29(0.78-2.11)      | 1.48(0.81-2.71)      | 0.54(0.32-0.91) *    | 0.52(0.31-0.87) *    | 0.51(0.23-1.13)      |
| 124.5 to <208     | 0.50(0.28-0.88) *    | 0.44(0.24-0.83) *    | 0.49(0.26-0.92) *    | 0.65(0.35-1.19)      | 0.62(0.34-1.14)      | 0.74(0.41-1.32)      | 0.38(0.18-0.79) *    | 0.35(0.18-0.67) **   | 0.30(0.14-0.61) **   |
| ≥208              | 0.63(0.41-0.96) *    | 0.58(0.37-0.91) *    | 0.79(0.50-1.23)      | 0.78(0.38-1.63)      | 0.83(0.41-1.65)      | 1.05(0.56-1.97)      | 0.28(0.15-0.51) **   | 0.26(0.14-0.49) **   | 0.35(0.16-0.77) *    |

Abbreviations: The Consortium to Establish a Registry for Alzheimer’s Disease (CERAD); Digit Symbol Substitution Test (DSST).

<sup>1</sup>Calculated using binary logistic regression

Model 2 adjusted for age and gender

Model 3 adjusted for age and gender, race, educational level, marital status, income, BMI, energy, drinking status, smoking status, hypertension, diabetes, and stroke

\* $p < 0.05$ ; \*\* $p < 0.01$ .

**Table S4.** Weighted odds ratios (95% confidence intervals) for scores on CERAD test, Animal fluency test and DSST test across quartiles of caffeine intake from coffee, stratified by gender, NHANES 2011-2014 (N =1803).

|                   | CERAD test           |                      |                      | Animal Fluency test  |                      |                      | DSST                 |                      |                      |
|-------------------|----------------------|----------------------|----------------------|----------------------|----------------------|----------------------|----------------------|----------------------|----------------------|
|                   | Model 1 <sup>1</sup> | Model 2 <sup>1</sup> | Model 3 <sup>1</sup> | Model 1 <sup>1</sup> | Model 2 <sup>1</sup> | Model 3 <sup>1</sup> | Model 1 <sup>1</sup> | Model 2 <sup>1</sup> | Model 3 <sup>1</sup> |
| Women             |                      |                      |                      |                      |                      |                      |                      |                      |                      |
| Caffeine (mg/day) |                      |                      |                      |                      |                      |                      |                      |                      |                      |
| <67               | 1.00 (Ref.)          | 1.00 (Ref.)          | 1.00 (Ref.)          | 1.00 (Ref.)          | 1.00 (Ref.)          | 1.00 (Ref.)          | 1.00 (Ref.)          | 1.00 (Ref.)          | 1.00 (Ref.)          |
| 67 to <124.5      | 0.63(0.34-1.14)      | 0.63(0.36-1.11)      | 0.70(0.39-1.27)      | 1.01(0.45-2.19)      | 1.16(0.58-2.45)      | 1.35(0.71-2.80)      | 0.83(0.47-1.48)      | 0.85(0.48-1.51)      | 0.87(0.38-2.01)      |
| 124.5 to <208     | 0.31(0.18-0.51) **   | 0.32(0.19-0.53) **   | 0.34(0.17-0.65) **   | 0.52(0.31-0.85) *    | 0.56(0.33-0.97) *    | 0.69 (0.40-1.22)     | 0.58(0.24-1.39)      | 0.59(0.26-1.31)      | 0.46(0.18-1.19)      |
| ≥208              | 0.55(0.30-0.99) *    | 0.59(0.33-1.05)      | 0.72(0.39-1.33)      | 1.14(0.53-2.44)      | 1.30(0.61-2.78)      | 1.56(0.75-3.26)      | 0.33(0.18-0.59) **   | 0.33(0.18-0.61) **   | 0.39(0.20-0.76) **   |
| Men               |                      |                      |                      |                      |                      |                      |                      |                      |                      |
| Caffeine (mg/day) |                      |                      |                      |                      |                      |                      |                      |                      |                      |
| <67               | 1.00 (Ref.)          | 1.00 (Ref.)          | 1.00 (Ref.)          | 1.00 (Ref.)          | 1.00 (Ref.)          | 1.00 (Ref.)          | 1.00 (Ref.)          | 1.00 (Ref.)          | 1.00 (Ref.)          |
| 67 to <124.5      | 0.79(0.44-1.44)      | 0.81(0.44-1.47)      | 0.92(0.46-1.81)      | 0.87(0.51-1.47)      | 0.89(0.53-1.46)      | 0.97(0.53-1.76)      | 0.65(0.34-1.21)      | 0.65(0.35-1.20)      | 0.74(0.37-1.50)      |
| 124.5 to <208     | 0.88(0.41-1.92)      | 0.87(0.39-1.97)      | 0.99(0.45-1.98)      | 0.84(0.48-1.46)      | 0.82(0.48-1.38)      | 1.05(0.58-1.89)      | 0.51(0.28-0.91) *    | 0.49(0.28-0.85) *    | 0.58(0.28-1.22)      |
| ≥208              | 0.59(0.34-0.99) *    | 0.61(0.35-1.06)      | 0.91(0.49-1.66)      | 0.49(0.30-0.81) *    | 0.53(0.32-0.87) *    | 0.71(0.37-1.33)      | 0.47(0.22-0.99) *    | 0.50(0.23-1.07)      | 0.87(0.35-2.17)      |

Abbreviations: The Consortium to Establish a Registry for Alzheimer’s Disease (CERAD); Digit Symbol Substitution Test (DSST).

<sup>1</sup>Calculated using binary logistic regression

Model 2 adjusted for age

Model 3 adjusted for age, race, educational level, marital status, income, BMI, energy, drinking status, smoking status, hypertension, diabetes, and stroke

\* $p < 0.05$ ; \*\* $p < 0.01$ .

Table 5. Weighted Regression coefficients ( $\beta$ ) and 95% confidence intervals for scores on CERAD test, Animal Fluency test, and DSST test across total coffee intake, NHANES 2011–2014 (N = 2513).

|                                                                                                                                                                                                                                                                                                                                                                                                                                           | Total coffee intake (g/day) |
|-------------------------------------------------------------------------------------------------------------------------------------------------------------------------------------------------------------------------------------------------------------------------------------------------------------------------------------------------------------------------------------------------------------------------------------------|-----------------------------|
| <b>CERAD test Score</b>                                                                                                                                                                                                                                                                                                                                                                                                                   |                             |
| Model 1 <sup>1</sup>                                                                                                                                                                                                                                                                                                                                                                                                                      | 0.0005(-0.0004-0.0016)      |
| Model 2 <sup>1</sup>                                                                                                                                                                                                                                                                                                                                                                                                                      | 0.0005(-0.0003-0.0015)      |
| Model 3 <sup>1</sup>                                                                                                                                                                                                                                                                                                                                                                                                                      | -0.0001(-0.001-0.0009)      |
| <b>Animal Fluency test Score</b>                                                                                                                                                                                                                                                                                                                                                                                                          |                             |
| Model 1 <sup>1</sup>                                                                                                                                                                                                                                                                                                                                                                                                                      | 0.0010(0.0001-0.0018) *     |
| Model 2 <sup>1</sup>                                                                                                                                                                                                                                                                                                                                                                                                                      | 0.0007(-0.0001-0.0014)      |
| Model 3 <sup>1</sup>                                                                                                                                                                                                                                                                                                                                                                                                                      | 0.0003(-0.0004-0.0012)      |
| <b>DSST test Score</b>                                                                                                                                                                                                                                                                                                                                                                                                                    |                             |
| Model 1 <sup>1</sup>                                                                                                                                                                                                                                                                                                                                                                                                                      | 0.0030(0.001-0.005) **      |
| Model 2 <sup>1</sup>                                                                                                                                                                                                                                                                                                                                                                                                                      | 0.0029(0.0008-0.005) **     |
| Model 3 <sup>1</sup>                                                                                                                                                                                                                                                                                                                                                                                                                      | 0.0017(0.0001-0.003) *      |
| <b>Abbreviations: The Consortium to Establish a Registry for Alzheimer’s Disease (CERAD); Digit Symbol Substitution Test (DSST).</b><br><sup>1</sup> Calculated using liner regression<br>Model 2 adjusted for age and gender<br>Model 3 adjusted for age and gender, race, educational level, marital status, income, BMI, energy, drinking status, smoking status, hypertension, diabetes, and stroke<br>* $p < 0.05$ ; ** $p < 0.01$ . |                             |

**Table 6.** Weighted Regression coefficients ( $\beta$ ) and 95% confidence intervals for scores on CERAD test, Animal Fluency test, and DSST test across caffeinated coffee and decaffeinated coffee, NHANES 2011–2014 (N = 2513).

|                                                                                                                                                                               | <b>Caffeinated coffee (g/day)</b> | <b>Decaffeinated coffee (g/day)</b> |
|-------------------------------------------------------------------------------------------------------------------------------------------------------------------------------|-----------------------------------|-------------------------------------|
| <b>CERAD test Score</b>                                                                                                                                                       |                                   |                                     |
| Model 1 <sup>1</sup>                                                                                                                                                          | 0.0005(-0.0005-0.0016)            | 0.0003(-0.001-0.0016)               |
| Model 2 <sup>1</sup>                                                                                                                                                          | 0.0005(-0.0006-0.0016)            | 0.0004(-0.0009-0.0017)              |
| Model 3 <sup>1</sup>                                                                                                                                                          | 0.00002(-0.001-0.0011)            | 0.0002(-0.0009-0.0014)              |
| <b>Animal Fluency test Score</b>                                                                                                                                              |                                   |                                     |
| Model 1 <sup>1</sup>                                                                                                                                                          | 0.0012(0.0004-0.0019) **          | -0.0006(-0.0017-0.0005)             |
| Model 2 <sup>1</sup>                                                                                                                                                          | 0.0008(-0.0001-0.0016) *          | -0.0004(-0.0016-0.0009)             |
| Model 3 <sup>1</sup>                                                                                                                                                          | 0.0006(0.00001-0.0013) *          | -0.0005(-0.0017-0.0007)             |
| <b>DSST test Score</b>                                                                                                                                                        |                                   |                                     |
| Model 1 <sup>1</sup>                                                                                                                                                          | 0.0027(0.0005-0.0049) *           | 0.0023(-0.0012-0.0058)              |
| Model 2 <sup>1</sup>                                                                                                                                                          | 0.0025(0.0003-0.0046) *           | 0.0027(-0.0004-0.0059)              |
| Model 3 <sup>1</sup>                                                                                                                                                          | 0.0021(0.0003-0.004) *            | 0.0022(-0.0005-0.005)               |
| <b>Abbreviations: The Consortium to Establish a Registry for Alzheimer’s Disease (CERAD); Digit Symbol Substitution Test (DSST).</b>                                          |                                   |                                     |
| <b><sup>1</sup>Calculated using liner regression</b>                                                                                                                          |                                   |                                     |
| <b>Model 2 adjusted for age and gender</b>                                                                                                                                    |                                   |                                     |
| <b>Model 3 adjusted for age and gender, race, educational level, marital status, income, BMI, energy, drinking status, smoking status, hypertension, diabetes, and stroke</b> |                                   |                                     |
| <b>*<math>p &lt; 0.05</math>; **<math>p &lt; 0.01</math>.</b>                                                                                                                 |                                   |                                     |

**Table 7.** Weighted Regression coefficients ( $\beta$ ) and 95% confidence intervals for scores on CERAD test, Animal Fluency test, and DSST test across caffeine intake from coffee, NHANES 2011–2014 (N = 1803).

|                                                                                                                                                                                                                                                                                                                                                                                                                                           | <b>Caffeine intake (g/day)</b> |
|-------------------------------------------------------------------------------------------------------------------------------------------------------------------------------------------------------------------------------------------------------------------------------------------------------------------------------------------------------------------------------------------------------------------------------------------|--------------------------------|
| <b>CERAD test Score</b>                                                                                                                                                                                                                                                                                                                                                                                                                   |                                |
| Model 1 <sup>1</sup>                                                                                                                                                                                                                                                                                                                                                                                                                      | 0.0044(0.0017-0.0071) **       |
| Model 2 <sup>1</sup>                                                                                                                                                                                                                                                                                                                                                                                                                      | 0.0027(0.0001-0.0053) *        |
| Model 3 <sup>1</sup>                                                                                                                                                                                                                                                                                                                                                                                                                      | 0.0025(0.0001-0.0049) *        |
| <b>Animal Fluency test Score</b>                                                                                                                                                                                                                                                                                                                                                                                                          |                                |
| Model 1 <sup>1</sup>                                                                                                                                                                                                                                                                                                                                                                                                                      | 0.0018(-0.0010-0.0047)         |
| Model 2 <sup>1</sup>                                                                                                                                                                                                                                                                                                                                                                                                                      | 0.0011(-0.0018-0.0039)         |
| Model 3 <sup>1</sup>                                                                                                                                                                                                                                                                                                                                                                                                                      | -0.0002(-0.0028-0.0023)        |
| <b>DSST test Score</b>                                                                                                                                                                                                                                                                                                                                                                                                                    |                                |
| Model 1 <sup>1</sup>                                                                                                                                                                                                                                                                                                                                                                                                                      | 0.0073(0.0001-0.0145) *        |
| Model 2 <sup>1</sup>                                                                                                                                                                                                                                                                                                                                                                                                                      | 0.0049(-0.0016-0.011)          |
| Model 3 <sup>1</sup>                                                                                                                                                                                                                                                                                                                                                                                                                      | 0.0046(-0.0015-0.010)          |
| <b>Abbreviations: The Consortium to Establish a Registry for Alzheimer’s Disease (CERAD); Digit Symbol Substitution Test (DSST).</b><br><sup>1</sup> Calculated using liner regression<br>Model 2 adjusted for age and gender<br>Model 3 adjusted for age and gender, race, educational level, marital status, income, BMI, energy, drinking status, smoking status, hypertension, diabetes, and stroke<br>* $p < 0.05$ ; ** $p < 0.01$ . |                                |
